# Supplementary material
Source: ML conference proceedings conference paper supplement (https://proceedings.neurips.cc/paper_files/paper/2022/hash/1bf03a03ca8fc5918fdcacb22e14c374-Abstract.html)
Supplement: Supplementary file 1 [file 1bf03a03ca8fc5918fdcacb22e14c374-Supplemental-Conference.zip]

Archive with 1 entries (1 files):
- Main.pdf
